# Supplementary material for: Mapping the Homeostatic and Hedonic Brain Responses to Stevia Compared to Caloric Sweeteners and Water: A Double-Blind Randomised Controlled Crossover Trial in Healthy Adults
Source: MDPI journal article supplement (doi:10.3390/nu14194172), 2022-10-07
Supplement: s1 [file s1]

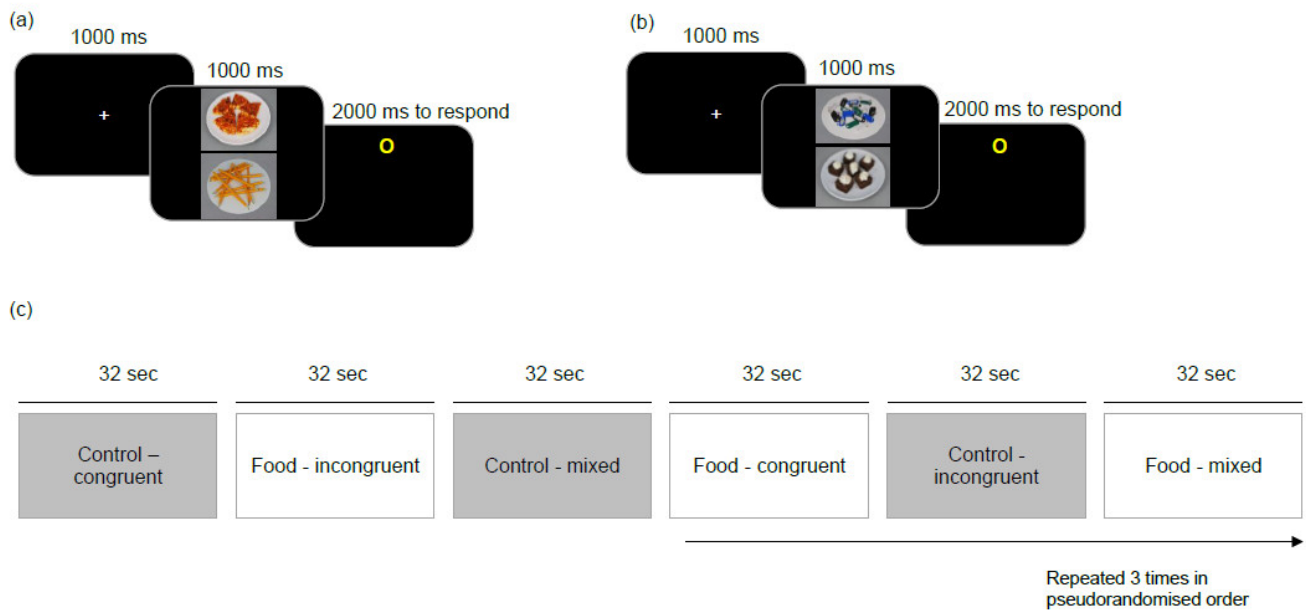

**Figure S1.** Illustration of the visual probe task. Example of a (a) food congruent trial, (b) food incongruent trial and (c) block design of the visual probe task. In a food congruent trial the dot appears in the position of the food image, while in an incongruent trial the dot appears in the position of the non-food image.

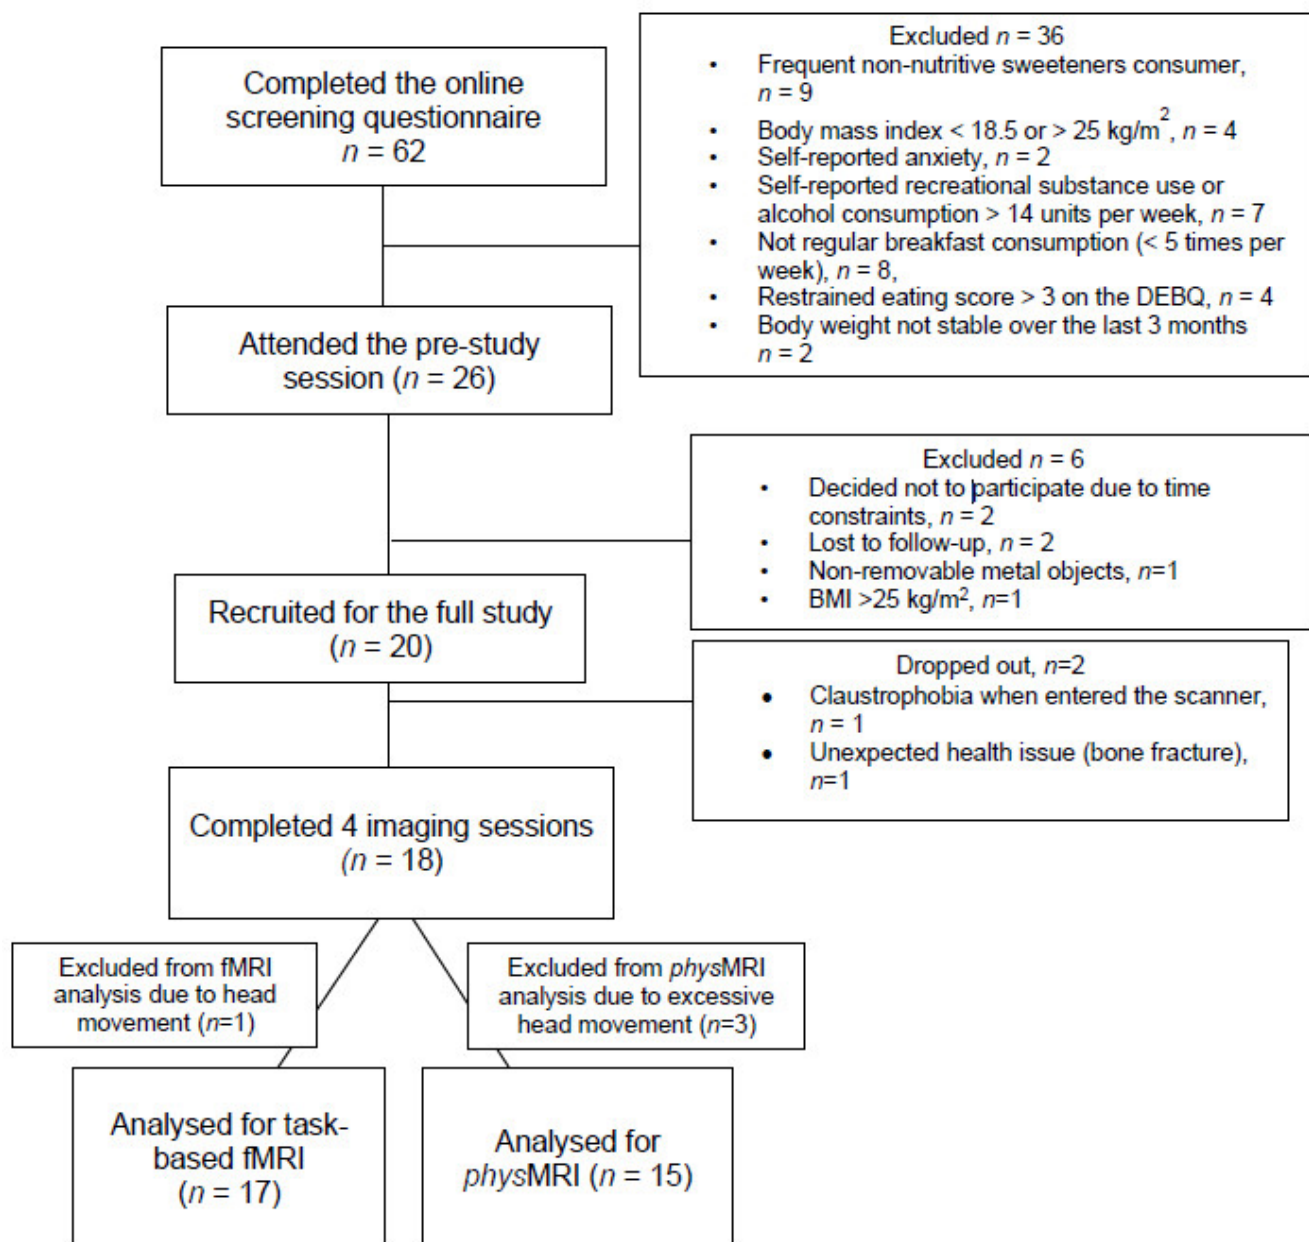

**Figure S2.** Participant flow chart. fMRI, functional magnetic resonance imaging; *physMRI*, physiological-MRI; DEBQ, Dutch Eating Behavior Questionnaire; BMI, body mass index.

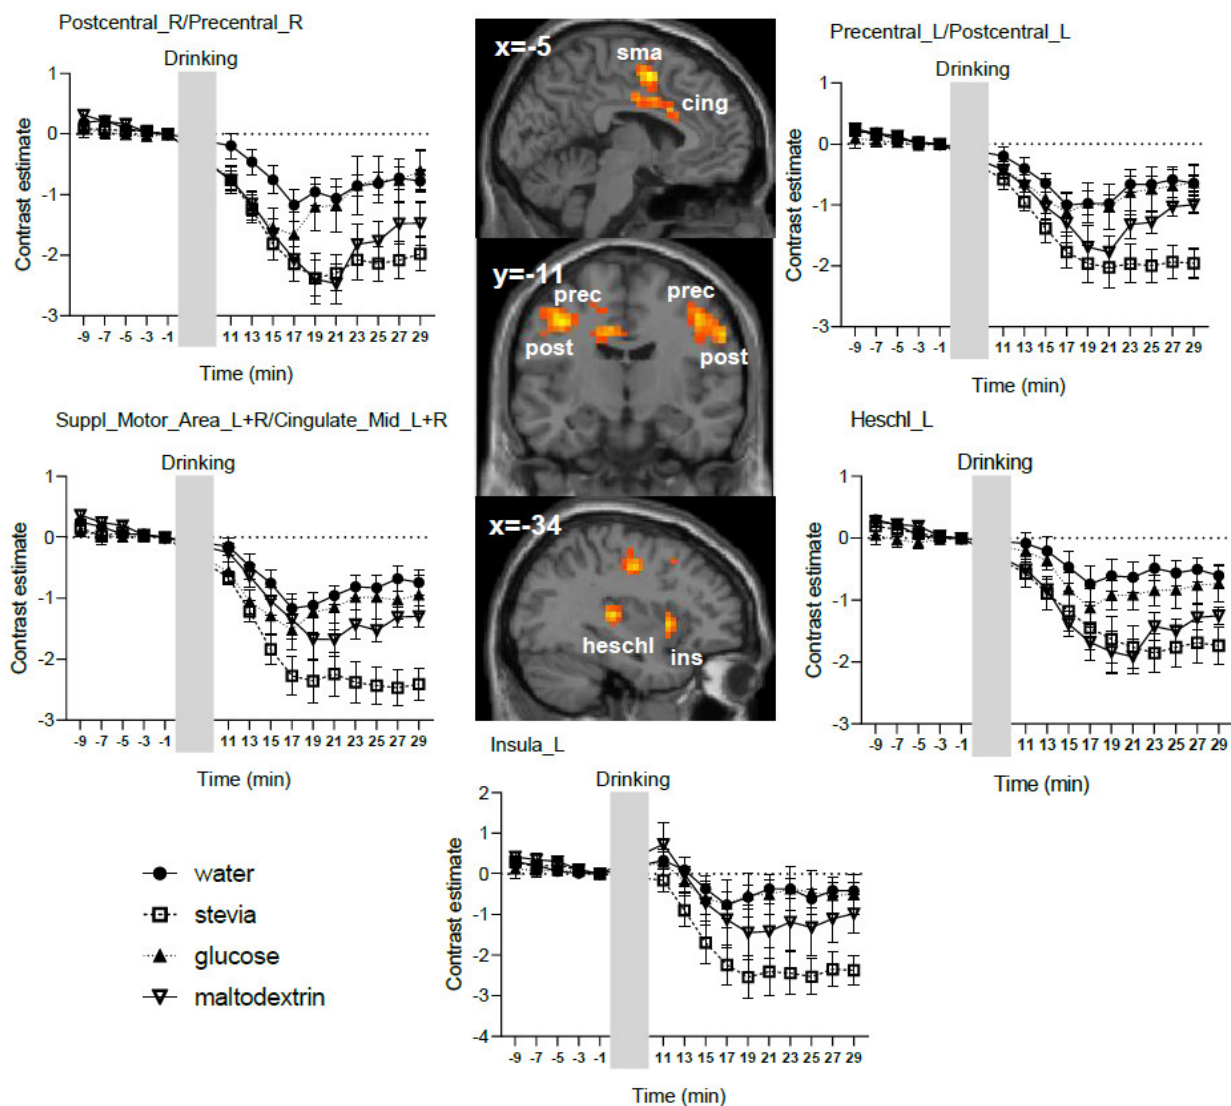

**Figure S3.** Line graphs present changes in blood-oxygenation-level-dependent (BOLD) signal over time in clusters that showed a significant interaction of taste-by-calories-by-time,  $n = 15$ . Brain overlays show areas exhibiting significant effect of taste-by-calories-by-time at a cluster extent  $P_{FWE} < 0.05$  at a height threshold of  $p < 0.001$  uncorrected. Cing, cingulate cortex; heschl, Heschl's gyri or transverse temporal gyrus; ins, insula; post, postcentral gyrus; prec, precentral gyrus; sma, supplementary motor area.

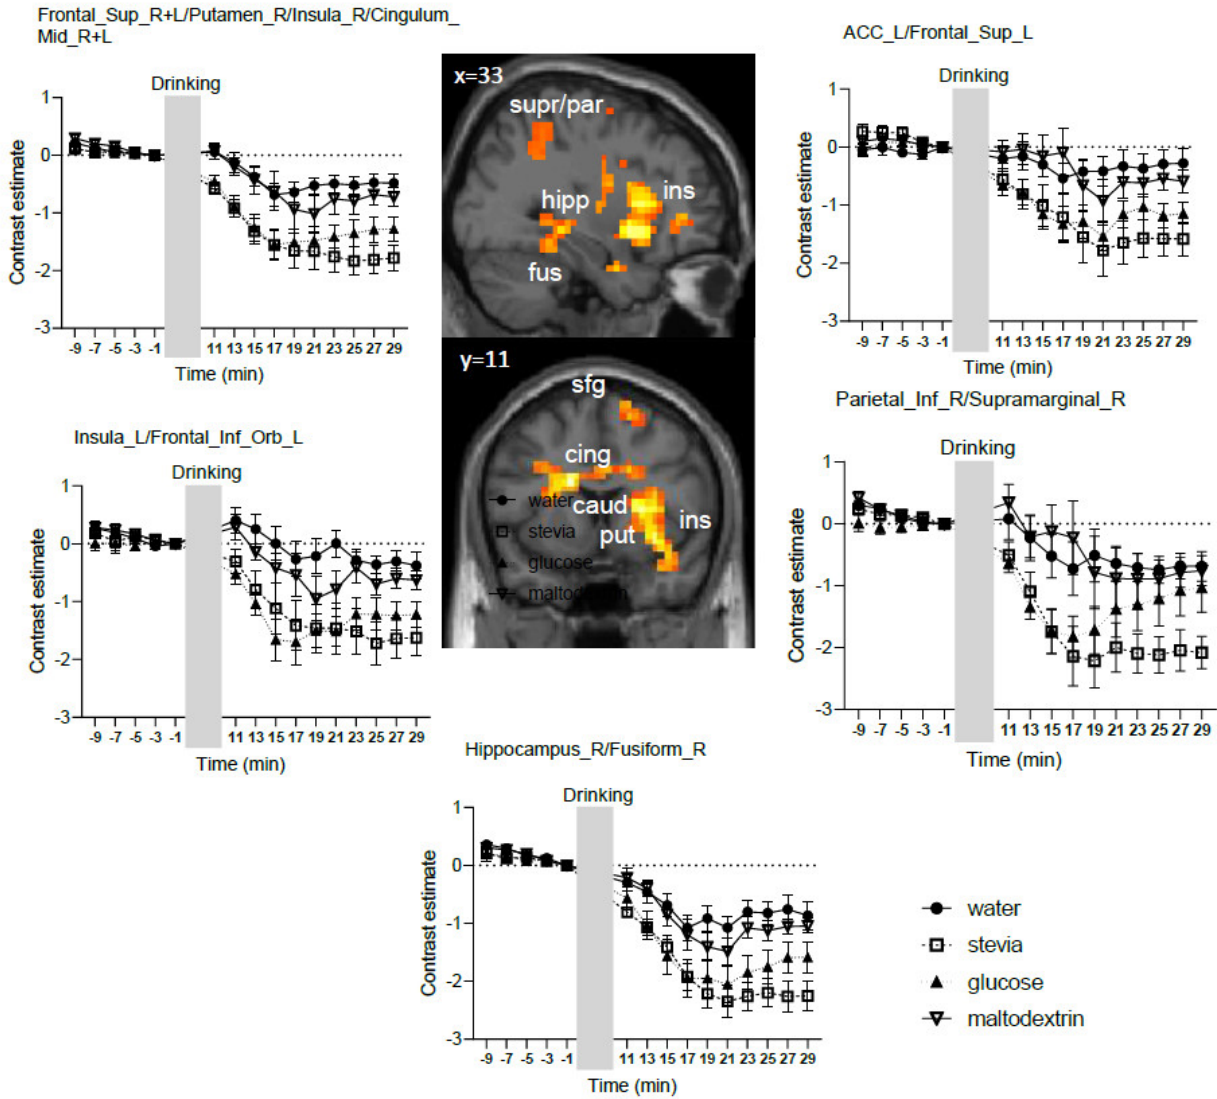

**Figure S4.** Line graphs present changes in blood-oxygenation-level-dependent (BOLD) signal over time in the significant clusters following oral ingestion of the sweet (stevia, glucose) compared to the non-sweet beverages (water, maltodextrin),  $n = 15$ . Brain images show areas exhibiting significant effect of time for sweet versus non-sweet beverages. Results correspond to cluster extent  $P_{FWE} < 0.05$  at a height threshold of  $p < 0.001$  uncorrected. Caud, caudate; cing, cingulate cortex; fus, fusiform gyrus; hipp, hippocampus; ins, insula; put, putamen; sfg, superior frontal gyrus; supr/par, supramarginal gyrus/inferior parietal lobule.

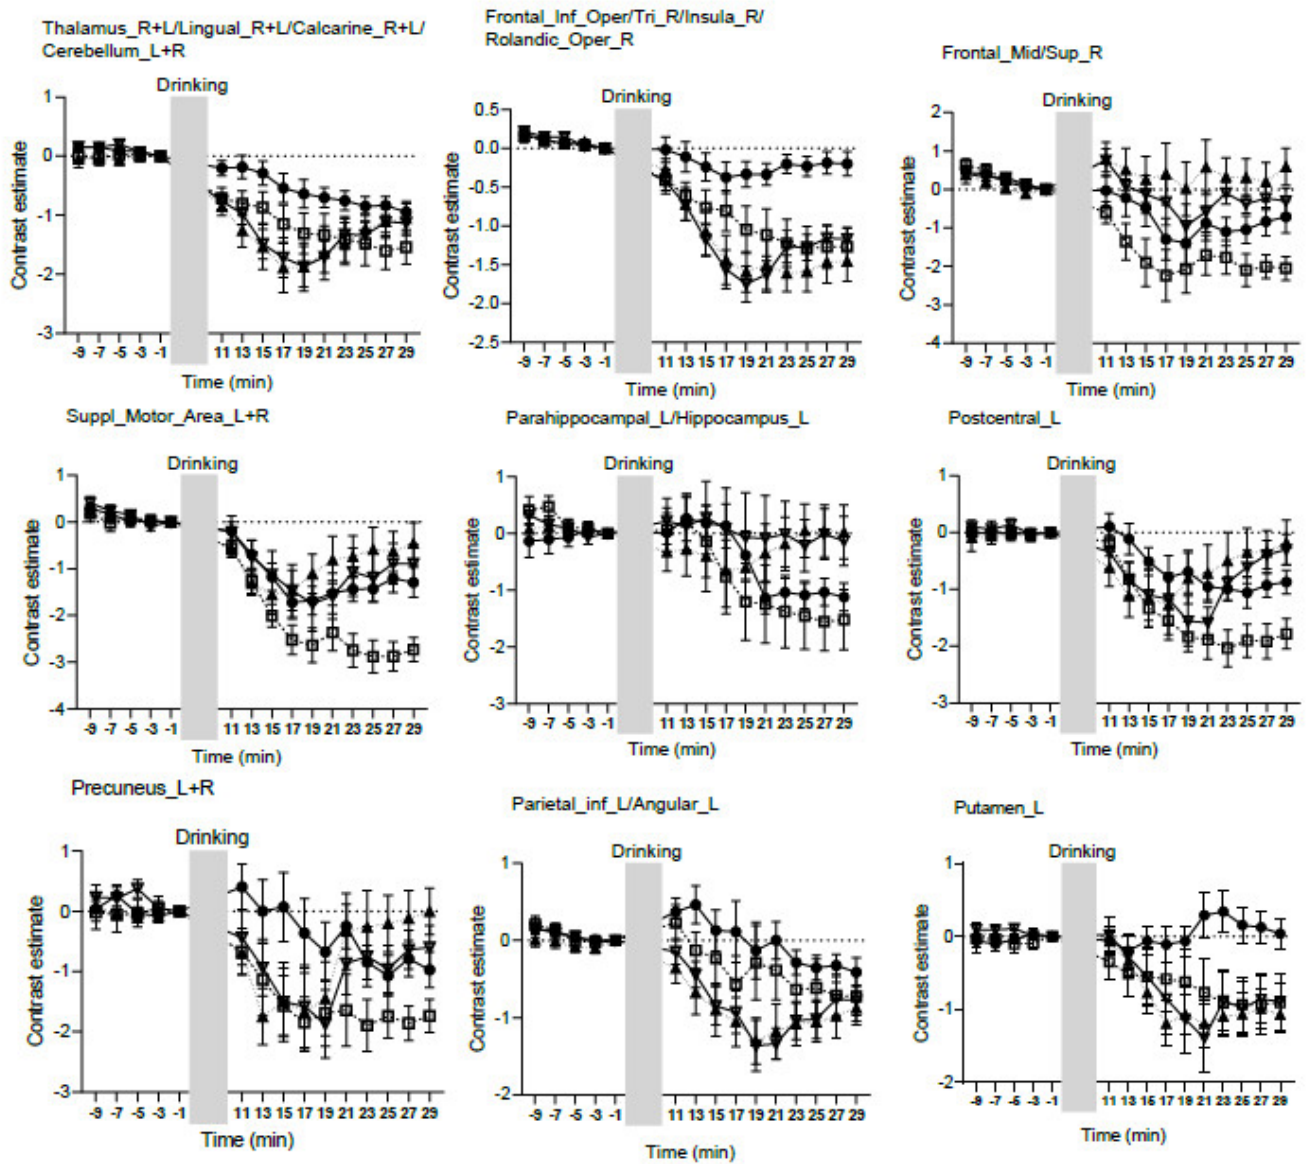

- water
- - -□- - stevia
- ...▲... glucose
- · - ▽ - maltodextrin

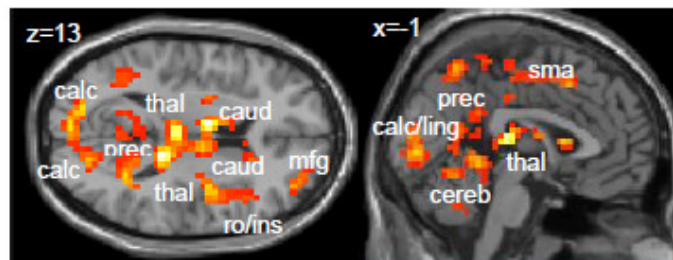

**Figure S5.** Line graphs present changes in blood-oxygenation-level-dependent (BOLD) signal over time in selected clusters that showed a significant effect of time in the comparison of caloric (glucose, maltodextrin) compared to the non-caloric beverages (water, stevia),  $n = 15$ . Brain overlays show areas exhibiting significant effect of calories-by-time at cluster extent  $P_{FWE} < 0.05$  at a height threshold of  $p < 0.001$  uncorrected. Calc, calcarine cortex; caud, caudate; cereb, cerebellum; ling, lingual gyrus; mfg, middle frontal gyrus; prec, precuneus; ro/ins, rolandic operculum/insula; sma, supplementary motor area; thal, thalamus.



**Table S1.** Participants' mood rating before the start of each imaging session,  $n = 18$ .  $p$  values correspond to repeated-measures ANOVA with beverage type as within-subjects variable.

|              | <b>Water</b>     | <b>Stevia</b>    | <b>Glucose</b>   | <b>Maltodextrin</b> | <b><math>p</math> value</b> |
|--------------|------------------|------------------|------------------|---------------------|-----------------------------|
| Clear headed | 73.56 $\pm$ 3.53 | 75.50 $\pm$ 3.62 | 74.94 $\pm$ 3.68 | 70.06 $\pm$ 4.46    | 0.384                       |
| Energetic    | 67.44 $\pm$ 4.54 | 70.11 $\pm$ 4.21 | 68.72 $\pm$ 4.33 | 62.94 $\pm$ 4.82    | 0.271                       |
| Happy        | 76.22 $\pm$ 2.93 | 79.56 $\pm$ 2.91 | 76.11 $\pm$ 4.41 | 73.06 $\pm$ 3.82    | 0.235                       |
| Tired        | 39.56 $\pm$ 5.01 | 42.33 $\pm$ 5.65 | 44.00 $\pm$ 5.75 | 45.06 $\pm$ 5.37    | 0.848                       |
| Relaxed      | 69.44 $\pm$ 4.25 | 71.61 $\pm$ 3.42 | 72.83 $\pm$ 4.18 | 69.44 $\pm$ 4.25    | 0.737                       |
